# Supplementary material
Source: PubMed Central journal article supplement (PMC9117471)
Supplement: NIHMS1790778-supplement-fS1-6.pdf [file NIHMS1790778-supplement-fS1-6.pdf]

# **Impact of adolescent intermittent ethanol exposure on interneurons and their surrounding perineuronal nets in adulthood**

## **Supplemental Material**

*Authors:* Carol A. Dannenhoffer, PhD<sup>1</sup> \*, Alexander Gómez-A, PhD<sup>1</sup> \*, Victoria A. Macht, PhD<sup>1</sup>, Rayyanoor Jawad, BS<sup>1</sup>, E. Blake Sutherland<sup>1</sup>, Ryan P. Vetreno, PhD<sup>1,5</sup>, Fulton T. Crews, PhD<sup>1,5,6</sup>, Charlotte A. Boettiger, PhD<sup>1,2,3,4</sup>, Donita L. Robinson, PhD<sup>1,4,5</sup>

\*co-first authors

Author affiliations:

<sup>1</sup>Bowles Center for Alcohol Studies, School of Medicine, University of North Carolina at Chapel Hill

<sup>2</sup>Department of Psychology and Neuroscience, University of North Carolina at Chapel Hill

<sup>3</sup>Biomedical Research Imaging Center, University of North Carolina at Chapel Hill

<sup>4</sup>Neuroscience Curriculum, University of North Carolina at Chapel Hill

<sup>5</sup>Department of Psychiatry, School of Medicine, University of North Carolina at Chapel Hill

<sup>6</sup>Department of Pharmacology, School of Medicine, University of North Carolina at Chapel Hill

Corresponding author:

Donita L. Robinson, PhD.

Bowles Center for Alcohol Studies, CB 7178

University of North Carolina at Chapel Hill, NC, 27599-7178, USA

Telephone: 919-966-9178

Fax: 919-966-5679

E-mail: [dlr@unc.edu](mailto:dlr@unc.edu)

Supplemental Figure 1.

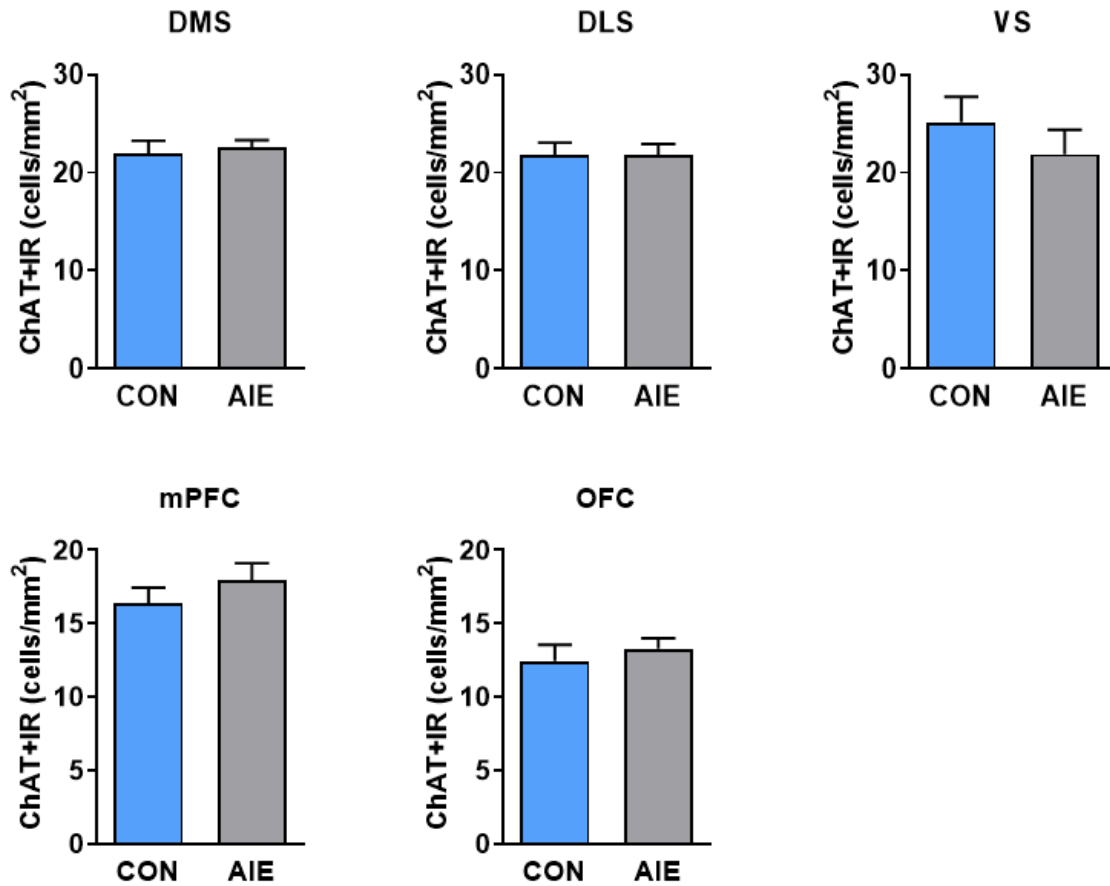

**Supplemental Figure 1. Adolescent intermittent ethanol (AIE) exposure did not alter striatal or prefrontal choline acetyltransferase (ChAT) expression.** T-tests were used to assess group differences within subregion; however,  $\alpha$  levels were adjusted to correct for multiple comparisons (striatum:  $\alpha=0.0167$ ; PFC:  $\alpha=0.025$ ). Top panel: The striatum was subdivided into dorsomedial (DMS), dorsolateral (DLS), and ventral (VS) regions. ChAT immunoreactivity (ChAT+IR) was not significantly different between AIE and control (CON) subjects in the DMS ( $p=0.677$ ), DLS ( $p=0.957$ ), or VS ( $p=0.387$ ). Bottom panel: The prefrontal cortex was subdivided into medial (mPFC) and orbitofrontal (OFC) regions. Neither of these subregions had differences in expression of ChAT (mPFC:  $p=0.335$ ; OFC:  $p=0.515$ ). Data are presented as mean  $\pm$  SEM.

**Supplemental Figure 2.**

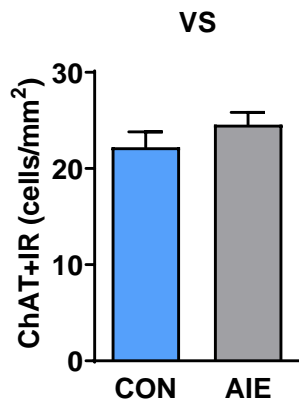

**Supplemental Figure 2.** Archived tissue from a previous study (CON n=8; AIE n=8) was used for follow-up analyses; that study used male Sprague-Dawley rats that underwent identical alcohol and water exposures. This follow-up analysis confirmed no change ( $p=0.255$ ) in ventral striatal ChAT expression following AIE exposure. Data are presented as mean  $\pm$  SEM.

Supplemental Figure 3.

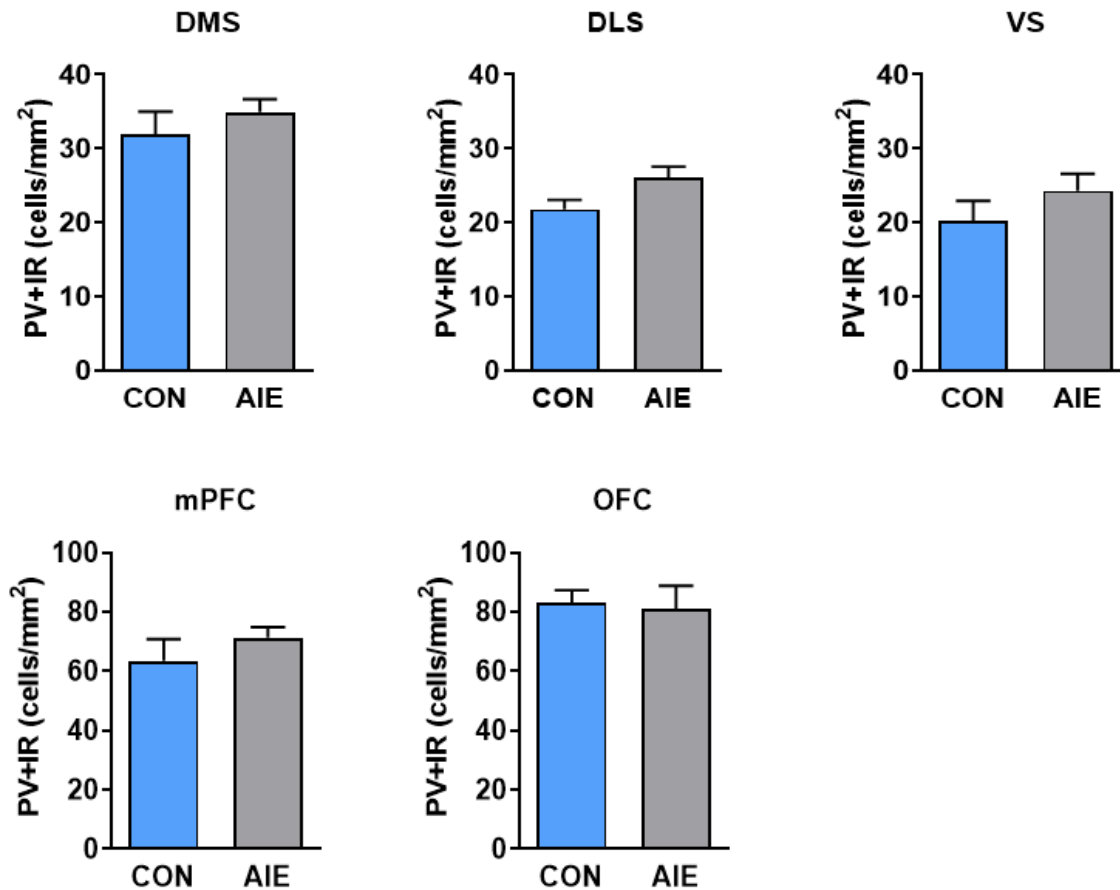

**Supplemental Figure 3. Parvalbumin (PV) expression is unaltered following AIE exposure.**

T-tests were used to assess group differences within subregion; however,  $\alpha$  levels were adjusted to correct for multiple comparisons (striatum:  $\alpha=0.0167$ ; PFC:  $\alpha=0.025$ ). Top panel: The striatum was subdivided into dorsomedial (DMS), dorsolateral (DLS), and ventral (VS). PV immunoreactivity (PV+IR) was not significantly different between AIE and CON subjects in the DMS ( $p=0.387$ ), DLS ( $p=0.051$ ), or VS ( $p=0.267$ ). Bottom panel: The PFC was subdivided into mPFC and OFC; however, no difference in PV expression was detected in either subregion (mPFC:  $p=0.317$ ; OFC:  $p=0.816$ ). Data are presented as mean  $\pm$  SEM.

**Supplemental Figure 4.**

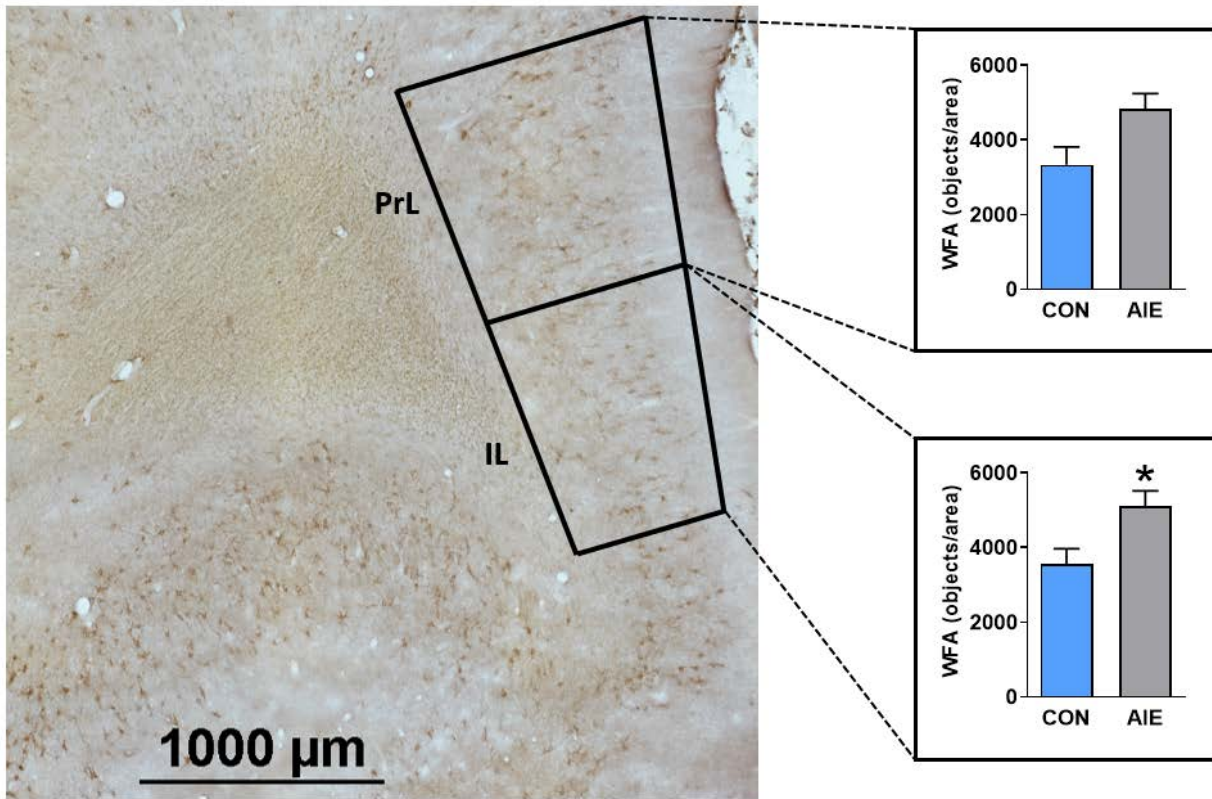

**Supplemental Figure 4.** We observed an increase in overall PNN density in the mPFC; hence we further subdivided this region into prelimbic (PrL) and infralimbic (IL) and adjusted  $\alpha$  to correct for multiple comparisons ( $\alpha=0.025$ ). PNN density was significantly higher within the IL of AIE rats ( $t(17) = 2.63$ ;  $p=0.02$ ) and a trend was observed within the PrL ( $p=0.0255$ ). Data are presented as mean  $\pm$  SEM. \* indicates main effect of exposure.

**Supplemental Figure 5.**

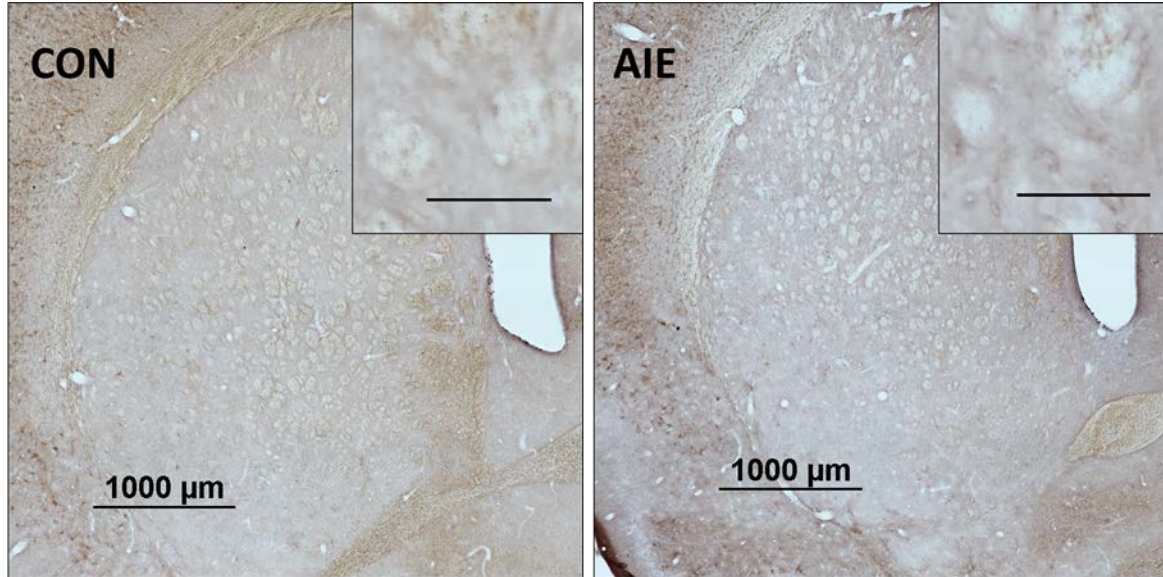

**Supplemental Figure 5.** We observed no PNNs within the striatum of rats; therefore, data analysis was not conducted on this area. Scale bar in small inset image represents 100 µm.

**Supplemental Figure 6.**

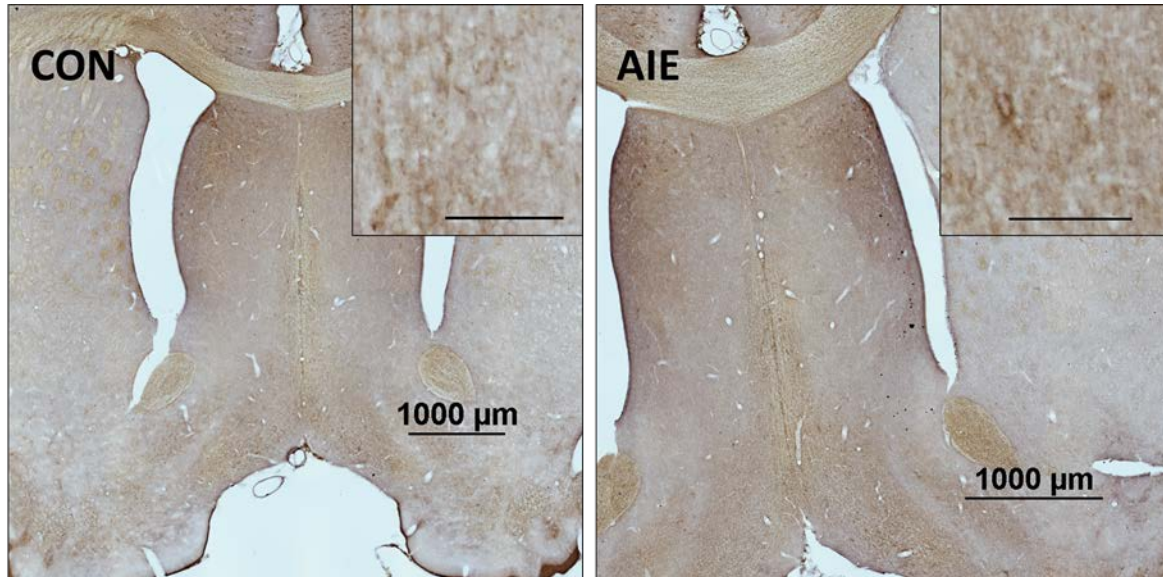

**Supplemental Figure 6.** We observed no PNNs within the basal forebrain of rats; therefore, data analysis was not conducted on this area. Scale bar in small inset image represents 100 µm.
